# Supplementary material
Source: Springer Nature journal article supplement (https://www.springermedizin.de/resource/supplementary/12889_2009_1919_MOESM1_ESM.pdf/9487202)

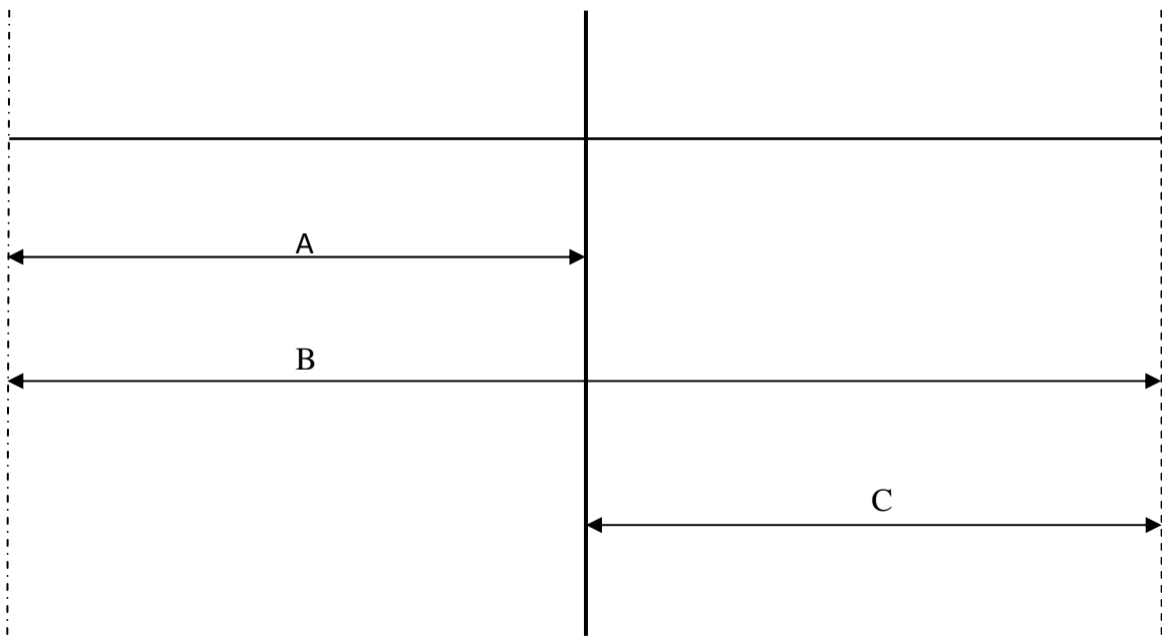

Supplement: MOESM1 [file 9487202]
